# Supplementary material
Source: MDPI journal article supplement (https://www.mdpi.com/2072-4292/12/3/406)
Supplement: s1 [file s1]

Supplementary Data

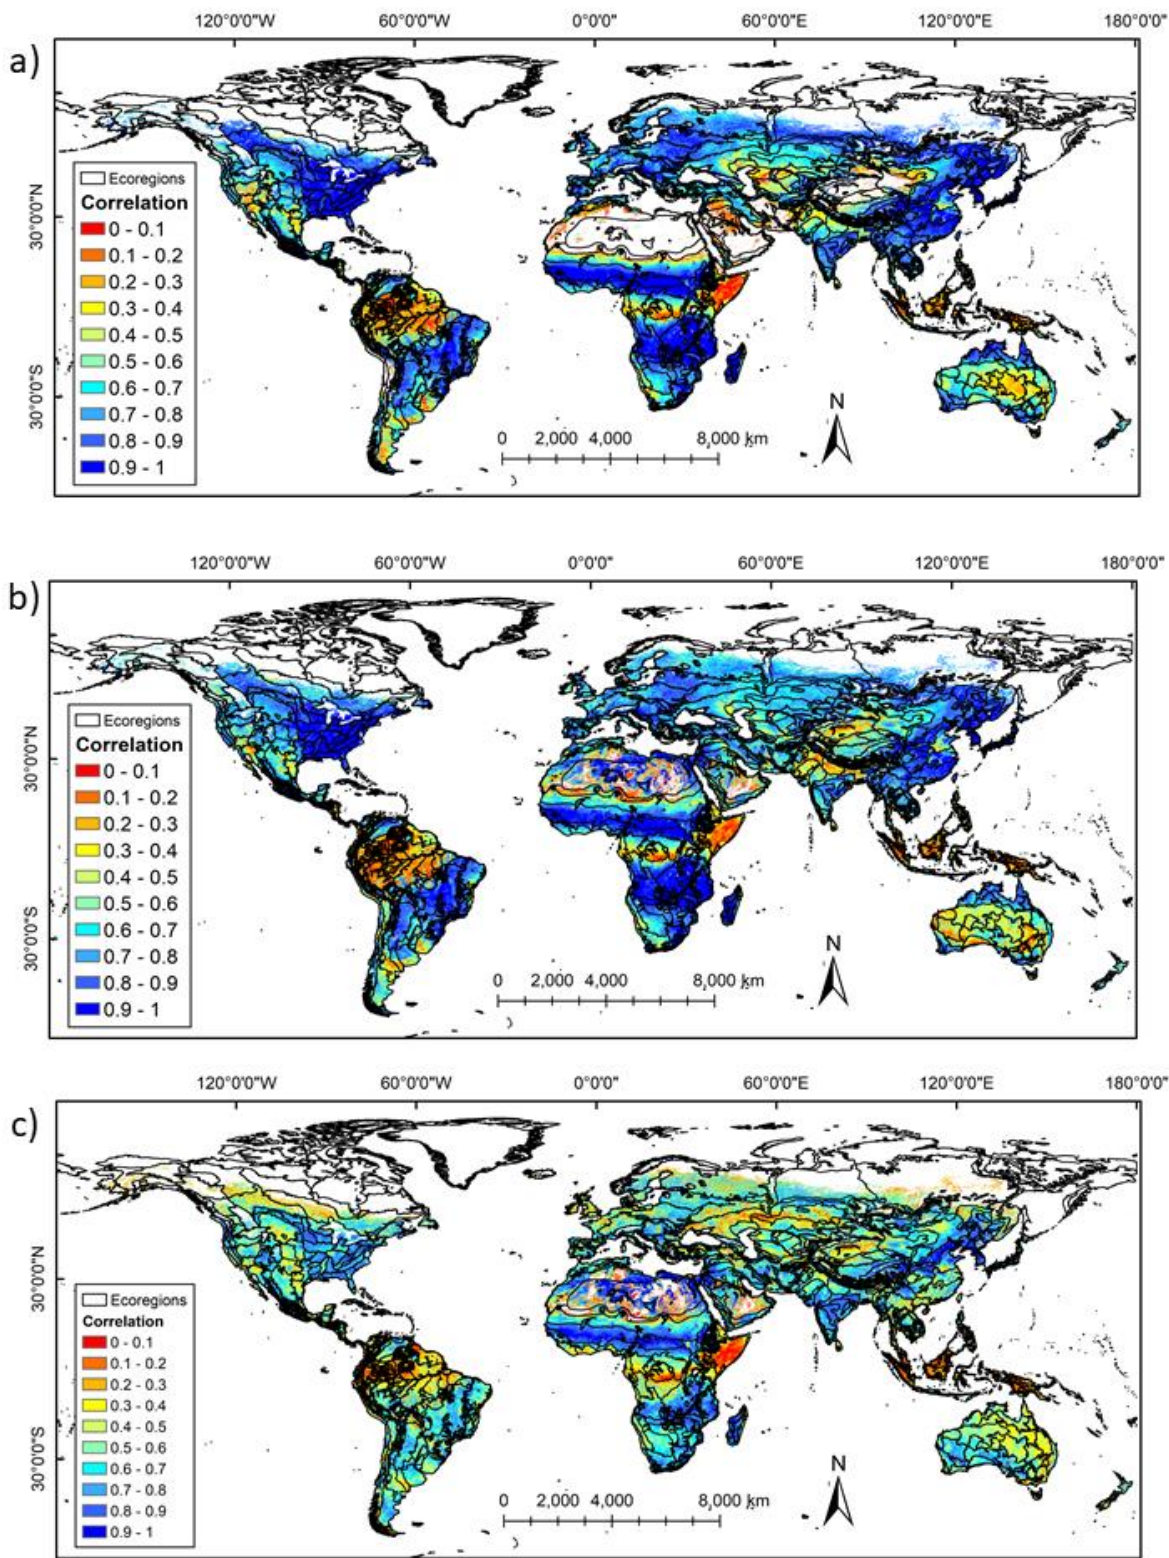

**Figure S1.** Correlation between cover fraction and fitted cosine curve (2001 – 2018). a)  $F_{PV}$ ; b)  $F_{NPV}$ ; and c)  $F_{BS}$ .

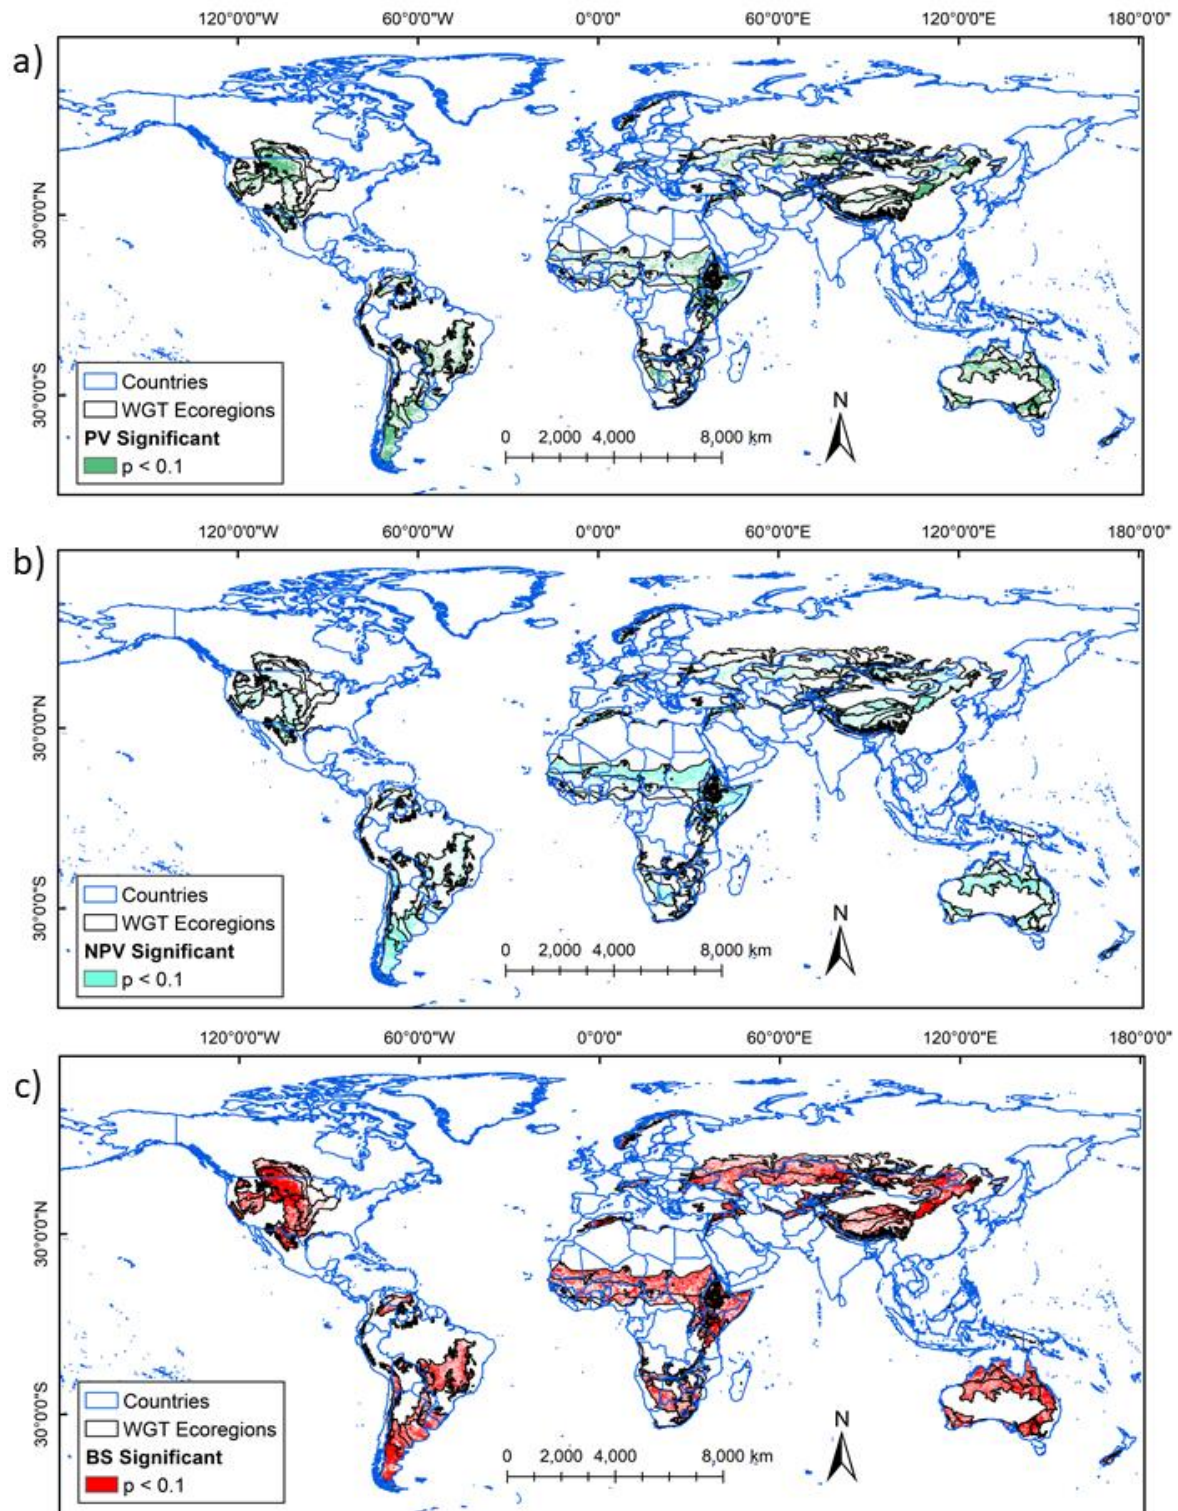

**Figure S2.** Areas within the WGT exhibiting significant trends at  $p < 0.1$  for a)  $F_{PV}$ ; b)  $F_{NPV}$ ; and c)  $F_{BS}$ .



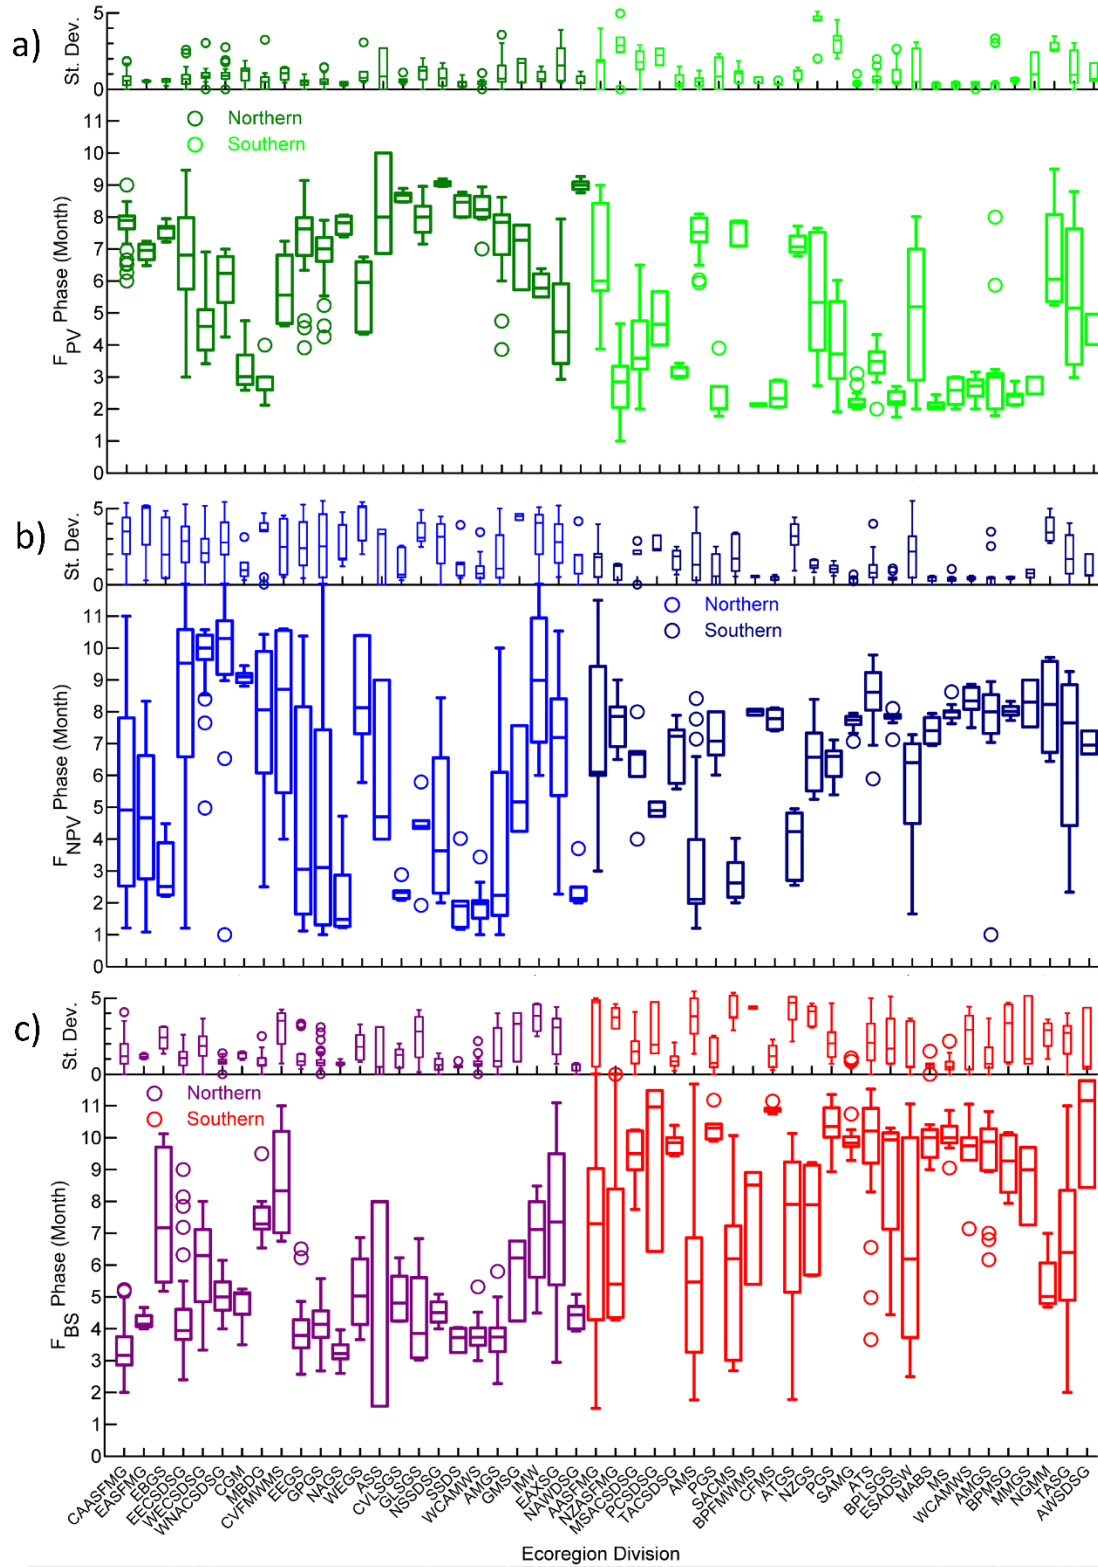

**Figure S4.** Fence box plots showing the median, upper and lower hinges and upper and lower fences of the average phase (month of maximum amplitude) of the cosine curve fitted to the time series of a)  $F_{PV}$ , b)  $F_{NPV}$  and c)  $F_{BS}$  for 2001 – 2018 within WGT Divisions (listed in Table A1).
